# Supplementary material for: Highly permeable thermally rearranged polymer composite membranes with a graphene oxide scaffold for gas separation
Source: Royal Society of Chemistry journal article supplement (doi:10.1039/c8ta02256a), 2018-01-01
Supplement: c8ta02256a1.pdf [file c8ta02256a1.pdf]

## Supporting Information

### **Highly permeable thermally rearranged polymer composite membranes with a graphene oxide scaffold for gas separation**

*Seungju Kim, Jue Hou, Yuqi Wang, Ranwen Ou, George P. Simon, Jong Geun Seong, Young Moo Lee, and Huanting Wang\**

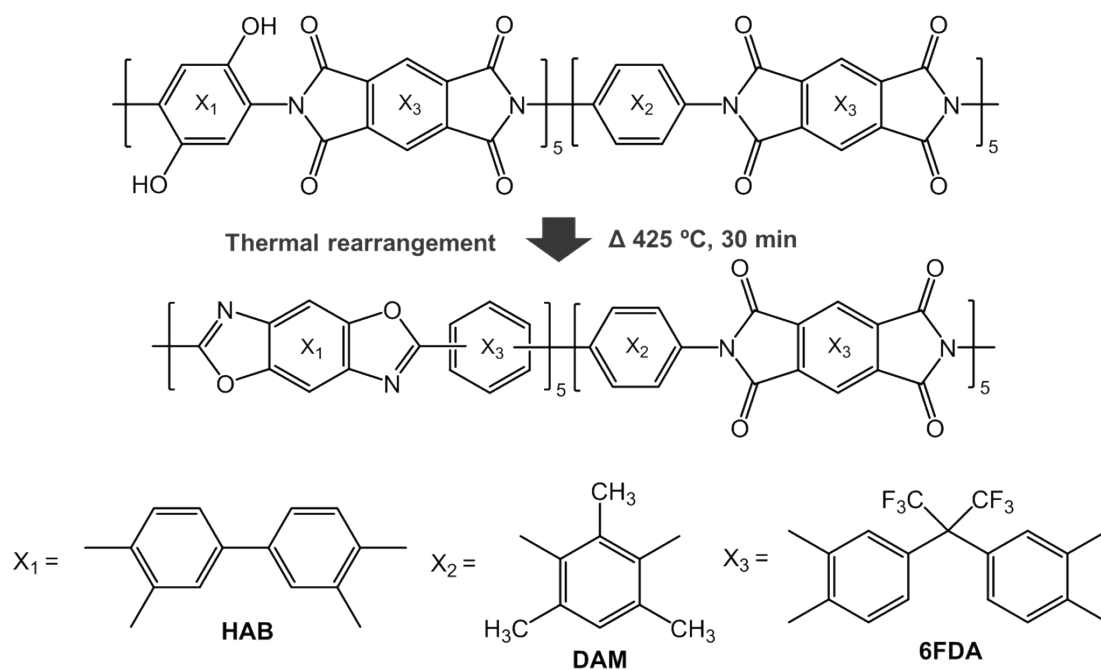

**Fig. S1** Chemical structures of the monomers, PI and TR-PBOI membranes.

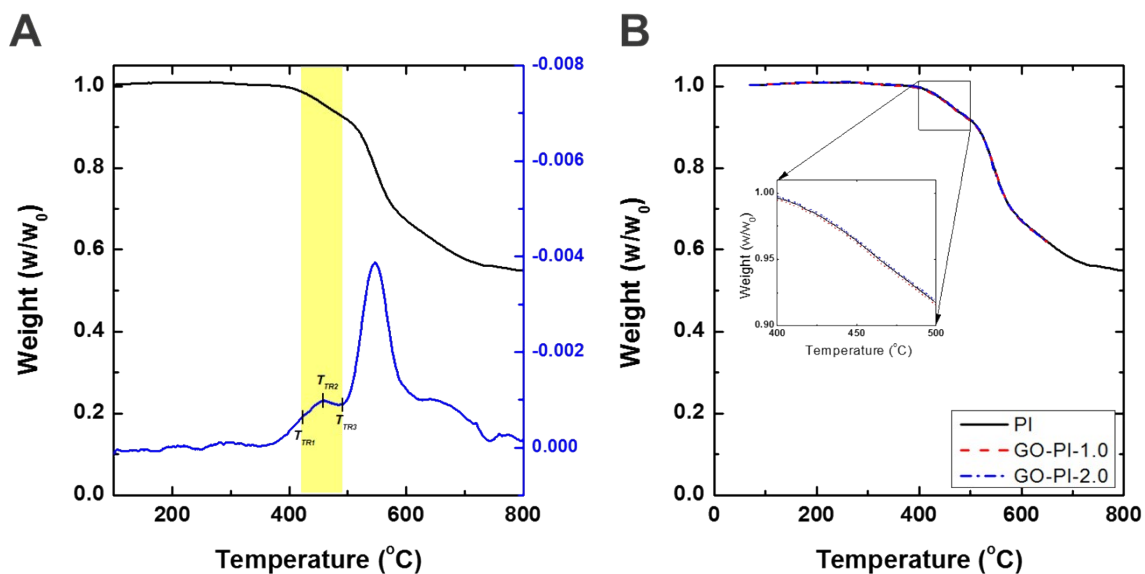

**Fig. S2** Thermogravimetric analysis (TGA) curves of PI and GO-PI freestanding membranes.

The first weight loss between 420 °C to 490 °C represents thermal conversion from PI to PBOI. Thermal rearrangement temperatures ( $T_{TR1}$ ,  $T_{TR2}$ , and  $T_{TR3}$ ) were determined from its derivation curve and a duration time at 425 °C was determined from its isotherm curve at 425 °C by comparing to theoretical and experimental weight loss of thermal conversion.

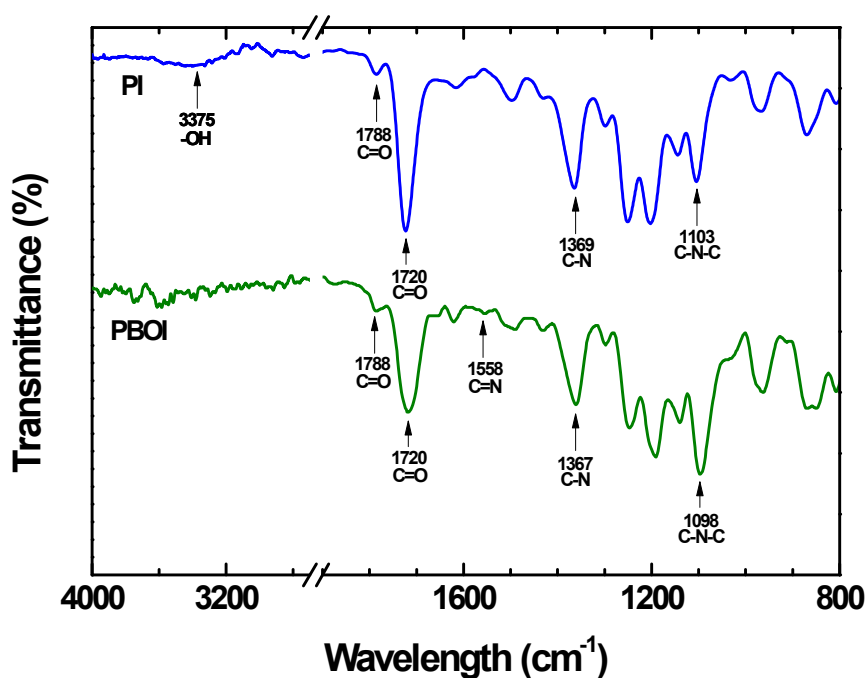

**Fig. S3** Fourier transform infrared spectroscopy (ATR-FTIR) spectra of PIs and TR-PBOIs.

Typical bands of imide at 1788 cm<sup>-1</sup>, 1720 cm<sup>-1</sup>, 1369 cm<sup>-1</sup>, and 1103 cm<sup>-1</sup> were found in both PIs and PBOIs and a broad band of hydroxyl groups (3375 cm<sup>-1</sup>) was only observed in PIs. Hydroxyl groups in PI and GO were disappeared during thermal rearrangement and a typical band of benzoxazoles (1558 cm<sup>-1</sup>) was appeared.

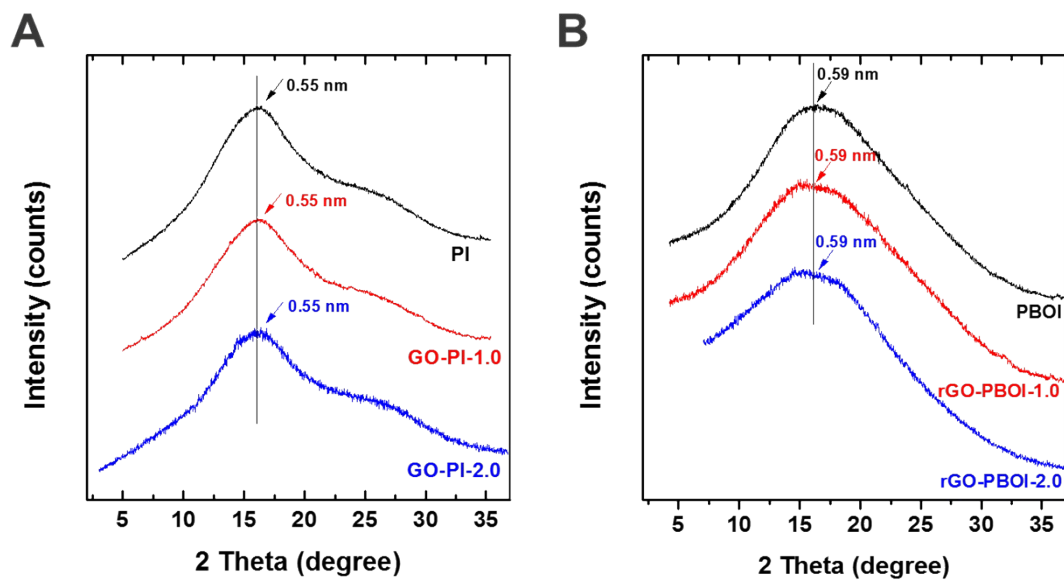

**Fig. S4** X-ray diffraction (XRD) curves of PIs and TR-PBOIs.

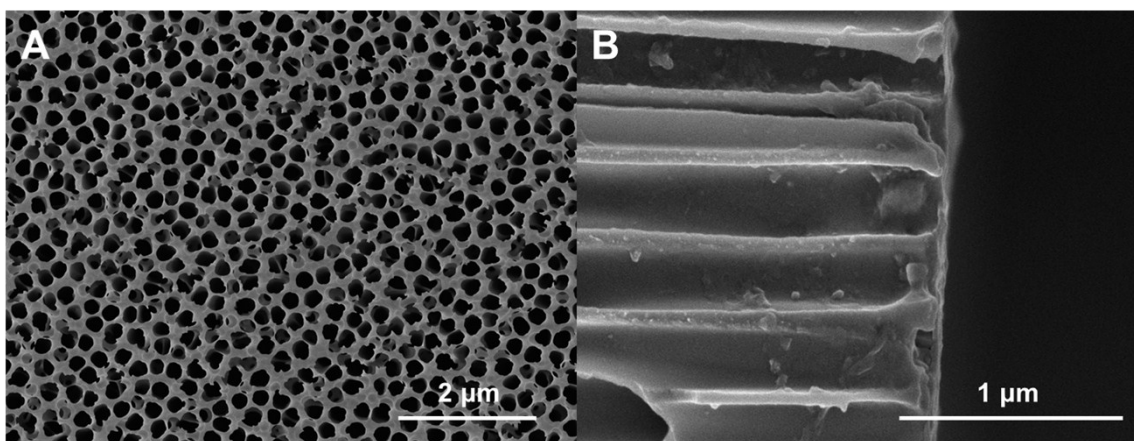

**Fig. S5** Scanning electron microscope (SEM) images of AAO substrate (a) surface and (b) cross-section.

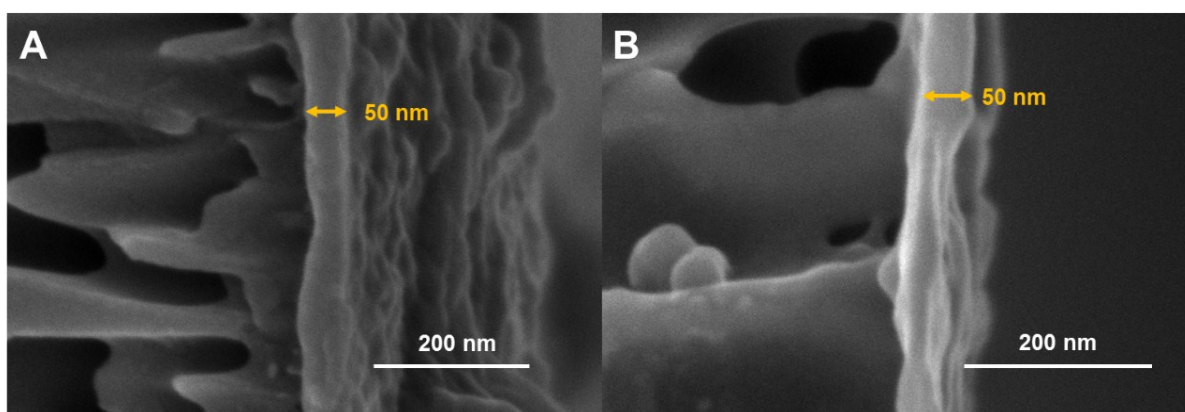

**Fig. S6** Scanning electron microscope (SEM) images of (a) GO-PI-2.0 and (b) rGO-PBOI-2.0 prepared from 2.0 wt% solution in THF.

**Table S1.** Single gas permeability and permeance of TR-PBOI freestanding membranes.

|                        | H <sub>2</sub> | CO <sub>2</sub> | O <sub>2</sub> | N <sub>2</sub> | CH <sub>4</sub> | H <sub>2</sub> /N <sub>2</sub> | CO <sub>2</sub> /N <sub>2</sub> | O <sub>2</sub> /N <sub>2</sub> | CO <sub>2</sub> /CH <sub>4</sub> |
|------------------------|----------------|-----------------|----------------|----------------|-----------------|--------------------------------|---------------------------------|--------------------------------|----------------------------------|
| Permeability (Barrer*) | 203            | 185             | 32             | 7.5            | 5.3             |                                |                                 |                                |                                  |
| Permeance (GPU*)       | 4.1            | 3.7             | 0.64           | 0.15           | 0.11            |                                |                                 |                                |                                  |
| Ideal selectivity      |                |                 |                |                |                 | 27                             | 26                              | 4.2                            | 35                               |

\*1 Barrer =  $10^{-10}$  cm<sup>3</sup>(STP) cm/cm<sup>2</sup> s cmHg =  $3.35 \times 10^{-16}$  mol m/m<sup>2</sup> s Pa

\*1 GPU =  $10^{-6}$  cm<sup>3</sup>(STP)/cm<sup>2</sup> s cmHg =  $3.35 \times 10^{-10}$  mol/m<sup>2</sup> s Pa

**Table S2.** Single gas permeance of rGO-PBOI membranes.

|              | Gas permeance (GPU) |                 |                |                |                 | Ideal selectivity              |                                 |                                |                                  |
|--------------|---------------------|-----------------|----------------|----------------|-----------------|--------------------------------|---------------------------------|--------------------------------|----------------------------------|
|              | H <sub>2</sub>      | CO <sub>2</sub> | O <sub>2</sub> | N <sub>2</sub> | CH <sub>4</sub> | H <sub>2</sub> /N <sub>2</sub> | CO <sub>2</sub> /N <sub>2</sub> | O <sub>2</sub> /N <sub>2</sub> | CO <sub>2</sub> /CH <sub>4</sub> |
| rGO-PBOI-1.0 | 1847                | 1784            | 363            | 101            | 55.1            | 18.3                           | 17.7                            | 3.6                            | 32.4                             |
| rGO-PBOI-1.5 | 1505                | 1450            | 280            | 76             | 41.7            | 19.8                           | 19.1                            | 3.7                            | 34.8                             |
| rGO-PBOI-2.0 | 1233                | 1149            | 201            | 56.4           | 29.4            | 21.3                           | 20.4                            | 3.6                            | 39.1                             |
| rGO-PBOI-2.2 | 986                 | 872             | 150            | 41.7           | 20.3            | 23.7                           | 20.9                            | 3.6                            | 43.0                             |
| rGO-PBOI-2.4 | 761                 | 673             | 125            | 30.7           | 15.1            | 24.8                           | 21.9                            | 4.1                            | 44.6                             |

**Table S3.** Mixed gas permeance of rGO-PBOI-1.0 membranes.

| Gas permeance (GPU)                    |                 |                                       |                |  | Separation factor                |                                 |
|----------------------------------------|-----------------|---------------------------------------|----------------|--|----------------------------------|---------------------------------|
| CO <sub>2</sub> - CH <sub>4</sub> pair |                 | CO <sub>2</sub> - N <sub>2</sub> pair |                |  |                                  |                                 |
| CO <sub>2</sub>                        | CH <sub>4</sub> | CO <sub>2</sub>                       | N <sub>2</sub> |  | CO <sub>2</sub> /CH <sub>4</sub> | CO <sub>2</sub> /N <sub>2</sub> |
| 1780                                   | 50.7            | 1785                                  | 98.1           |  | 35.1                             | 18.2                            |
